# Supplementary material for: Boosting visible-light photocatalytic H2 evolution via UiO-66-NH2 octahedrons decorated with ultrasmall NiO nanoparticles
Source: Royal Society of Chemistry journal article supplement (doi:10.1039/c8dt02681e), 2018-01-01
Supplement: c8dt02681e1.pdf [file c8dt02681e1.pdf]

## Supporting Information

### **Boosting visible-light photocatalytic H<sub>2</sub> evolution by UiO-66-NH<sub>2</sub> octahedrons with ultras-small NiO nanoparticles decorating**

Cong-Cong Shen,<sup>a, b</sup> Ya-Nan Liu,<sup>a</sup> Xin Wang,<sup>a</sup> Xiao-Xiang Fang,<sup>a</sup> Zhi-Wei Zhao,<sup>a</sup>  
Nan Jiang,<sup>a</sup> Liu-bo Ma,<sup>a</sup> Xiao Zhou,<sup>a</sup> Tuck-Yun Cheang<sup>\*c</sup> and An-Wu Xu<sup>\*a</sup>

<sup>a</sup> *Division of Nanomaterials and Chemistry, Hefei National Laboratory for Physical Sciences at Microscale, Department of chemistry, University of Science and Technology of China, Hefei 230026, P.R. China. E-mail: [anwuxu@ustc.edu.cn](mailto:anwuxu@ustc.edu.cn)*

<sup>b</sup> *School of Science, Tianjin Chengjian University, Tianjin 300384, China*

<sup>c</sup> *Department of Breast and Thyroid Surgery, The First Affiliated Hospital of Sun Yat-Sen University, Guangzhou 510080, China. E-mail: [13631322559@163.com](mailto:13631322559@163.com)*

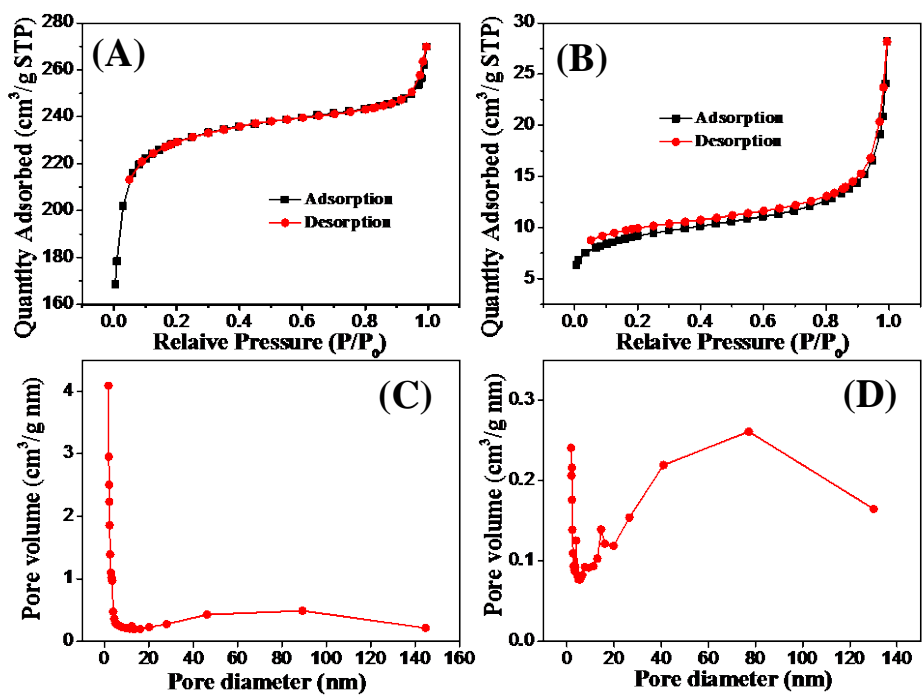

Fig. S1 Nitrogen adsorption–desorption isotherms of U6N (A) and U6N-NiO-2 (B) samples and the corresponding pore size distribution curves (C) and (D).

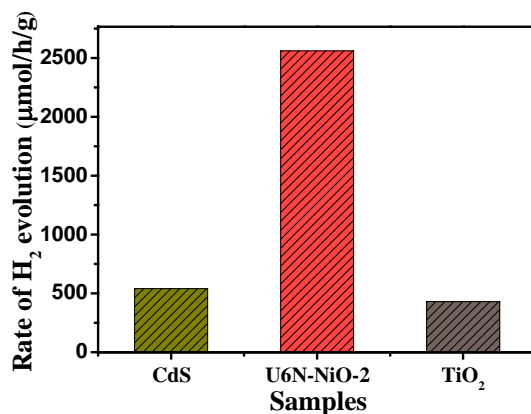

Fig. S2 Comparison of visible-light photocatalytic H<sub>2</sub> evolution activities between CdS, U6N-NiO-2 and TiO<sub>2</sub> samples. Reaction conditions are the same as those in Fig. 7B.
